# Supplementary material for: Microglia exit the CNS in spinal root avulsion
Source: PLoS Biol. 2019 Feb 22;17(2):e3000159. doi: 10.1371/journal.pbio.3000159 (PMC6402705; doi:10.1371/journal.pbio.3000159)
Supplement: S14 Data — All raw data and statistical values represented in different spreadsheet tabs per figure for S10A–S10M Fig. (XLSX) [file pbio.3000159.s048.xlsx]

## Sheet: SuppFig_10A
SUPPLEMENTARY FIGURE 10A: AVERAGE CIRCULARITY OF MICROGLIA FROM THE CNS TO PNS-EXPERIENCED BACK IN THE CNS
Circularity of Microglia						RAW STATS FROM PRISM
In CNS	Leaving CNS	In PNS	Re-entering CNS	Back in CNS		Table Analyzed	SuppFig 10A		Table Analyzed	SuppFig 10A
0.169	0.197	0.157	0.189	0.131
0.114	0.172	0.236	0.16	0.213		Column E	Back in CNS		Column C	In PNS
0.098	0.157	0.139	0.259	0.386		vs.	vs.		vs.	vs.
						Column A	In CNS		Column A	In CNS
Average circularity of microglia
In CNS	Leaving CNS	In PNS	Re-entering CNS	Back in CNS		Unpaired t test			Unpaired t test
0.127	0.175333	0.177333	0.202667	0.243333		P value	0.2109		P value	0.2425
						P value summary	ns		P value summary	ns
						Significantly different (P < 0.05)?	No		Significantly different (P < 0.05)?	No
						One- or two-tailed P value?	Two-tailed		One- or two-tailed P value?	Two-tailed
						t, df	t=1.488 df=4		t, df	t=1.37 df=4
						How big is the difference?			How big is the difference?
						Mean ± SEM of column A	0.127 ± 0.0215, n=3		Mean ± SEM of column A	0.127 ± 0.0215, n=3
						Mean ± SEM of column E	0.2433 ± 0.07516, n=3		Mean ± SEM of column C	0.1773 ± 0.02979, n=3
						Difference between means	0.1163 ± 0.07817		Difference between means	0.05033 ± 0.03674
						95% confidence interval	-0.1007 to 0.3334		95% confidence interval	-0.05167 to 0.1523
						R squared (eta squared)	0.3564		R squared (eta squared)	0.3194
						F test to compare variances			F test to compare variances
						F, DFn, Dfd	12.22, 2, 2		F, DFn, Dfd	1.919, 2, 2
						P value	0.1513		P value	0.6851
						P value summary	ns		P value summary	ns
						Significantly different (P < 0.05)?	No		Significantly different (P < 0.05)?	No

## Sheet: SuppFig_10B
SUPPLEMENTARY FIGURE 10B: AVERAGE ASPECT RATIO OF MICROGLIA FROM THE CNS TO PNS-EXPERIENCED BACK IN THE CNS
Aspect ratio of microglia						RAW STATS FROM PRISM
In CNS	Leaving CNS	In PNS	Re-entering CNS	Back in CNS		Table Analyzed	SuppFig 10B		Table Analyzed	SuppFig 10B
6.759	2.221	2.489	2.082	2.562
14.51	4.328	1.217	1.479	1.576		Column E	Back in CNS		Column C	In PNS
17.508	1.912	1.318	2.037	1.677		vs.	vs.		vs.	vs.
						Column A	In CNS		Column A	In CNS
Average aspect ratio of microglia
In CNS	Leaving CNS	In PNS	Re-entering CNS	Back in CNS		Unpaired t test			Unpaired t test
12.9257	2.82033	1.67467	1.866	1.93833		P value	0.0269		P value	0.0252
						P value summary	*		P value summary	*
						Significantly different (P < 0.05)?	Yes		Significantly different (P < 0.05)?	Yes
						One- or two-tailed P value?	Two-tailed		One- or two-tailed P value?	Two-tailed
						t, df	t=3.415 df=4		t, df	t=3.485 df=4
						How big is the difference?			How big is the difference?
						Mean ± SEM of column A	12.93 ± 3.202, n=3		Mean ± SEM of column A	12.93 ± 3.202, n=3
						Mean ± SEM of column E	1.938 ± 0.3132, n=3		Mean ± SEM of column C	1.675 ± 0.4082, n=3
						Difference between means	-10.99 ± 3.218		Difference between means	-11.25 ± 3.228
						95% confidence interval	-19.92 to -2.053		95% confidence interval	-20.21 to -2.288
						R squared (eta squared)	0.7446		R squared (eta squared)	0.7522
						F test to compare variances			F test to compare variances
						F, DFn, Dfd	104.6, 2, 2		F, DFn, Dfd	61.55, 2, 2
						P value	0.0189		P value	0.032
						P value summary	*		P value summary	*
						Significantly different (P < 0.05)?	Yes		Significantly different (P < 0.05)?	Yes

## Sheet: SuppFig_10C
SUPPLEMENTARY FIGURE 10C: AVERAGE ROUNDNESS OF MICROGLIA FROM THE CNS TO PNS-EXPERIENCED BACK IN THE CNS
Roundness of microglia						RAW STATS FROM PRISM
In CNS	Leaving CNS	In PNS	Re-entering CNS	Back in CNS		Table Analyzed	SuppFig 10C		Table Analyzed	SuppFig 10C
0.148	0.45	0.402	0.48	0.39
0.069	0.231	0.821	0.676	0.634		Column E	Back in CNS		Column C	In PNS
0.057	0.523	0.759	0.491	0.596		vs.	vs.		vs.	vs.
						Column A	In CNS		Column A	In CNS
Average roundness of microglia
In CNS	Leaving CNS	In PNS	Re-entering CNS	Back in CNS		Unpaired t test			Unpaired t test
0.0913333	0.401333	0.660667	0.549	0.54		P value	0.0052		P value	0.0131
						P value summary	**		P value summary	*
						Significantly different (P < 0.05)?	Yes		Significantly different (P < 0.05)?	Yes
						One- or two-tailed P value?	Two-tailed		One- or two-tailed P value?	Two-tailed
						t, df	t=5.539 df=4		t, df	t=4.26 df=4
						How big is the difference?			How big is the difference?
						Mean ± SEM of column A	0.09133 ± 0.02854, n=3		Mean ± SEM of column A	0.09133 ± 0.02854, n=3
						Mean ± SEM of column E	0.54 ± 0.0758, n=3		Mean ± SEM of column C	0.6607 ± 0.1306, n=3
						Difference between means	0.4487 ± 0.08099		Difference between means	0.5693 ± 0.1336
						95% confidence interval	0.2238 to 0.6735		95% confidence interval	0.1983 to 0.9404
						R squared (eta squared)	0.8847		R squared (eta squared)	0.8194
						F test to compare variances			F test to compare variances
						F, DFn, Dfd	7.051, 2, 2		F, DFn, Dfd	20.92, 2, 2
						P value	0.2484		P value	0.0912
						P value summary	ns		P value summary	ns
						Significantly different (P < 0.05)?	No		Significantly different (P < 0.05)?	No

## Sheet: SuppFig_10D
SUPPLEMENTARY FIGURE 10D: AVERAGE SOLIDITY OF MICROGLIA FROM THE CNS TO PNS-EXPERIENCED BACK IN THE CNS
Solidity of microglia						RAW STATS FROM PRISM
In CNS	Leaving CNS	In PNS	Re-entering CNS	Back in CNS		Table Analyzed	SuppFig 10D		Table Analyzed	SuppFig 10D
0.608	0.452	0.477	0.45	0.47
0.597	0.38	0.515	0.481	0.532		Column E	Back in CNS		Column C	In PNS
0.625	0.502	0.486	0.502	0.708		vs.	vs.		vs.	vs.
						Column A	In CNS		Column A	In CNS
Average solidity of microglia
In CNS	Leaving CNS	In PNS	Re-entering CNS	Back in CNS		Unpaired t test			Unpaired t test
0.61	0.444667	0.492667	0.477667	0.57		P value	0.6069		P value	0.0011
						P value summary	ns		P value summary	**
						Significantly different (P < 0.05)?	No		Significantly different (P < 0.05)?	Yes
						One- or two-tailed P value?	Two-tailed		One- or two-tailed P value?	Two-tailed
						t, df	t=0.5575 df=4		t, df	t=8.343 df=4
						How big is the difference?			How big is the difference?
						Mean ± SEM of column A	0.61 ± 0.008145, n=3		Mean ± SEM of column A	0.61 ± 0.008145, n=3
						Mean ± SEM of column E	0.57 ± 0.07128, n=3		Mean ± SEM of column C	0.4927 ± 0.01146, n=3
						Difference between means	-0.04 ± 0.07175		Difference between means	-0.1173 ± 0.01406
						95% confidence interval	-0.2392 to 0.1592		95% confidence interval	-0.1564 to -0.07829
						R squared (eta squared)	0.0721		R squared (eta squared)	0.9457
						F test to compare variances			F test to compare variances
						F, DFn, Dfd	76.6, 2, 2		F, DFn, Dfd	1.982, 2, 2
						P value	0.0258		P value	0.6708
						P value summary	*		P value summary	ns
						Significantly different (P < 0.05)?	Yes		Significantly different (P < 0.05)?	No

## Sheet: SuppFig_10E
SUPPLEMENTARY FIGURE 10E: AVERAGE CIRCULARITY OF MICROGLIA LEAVING CNS INJURY SITE VERSUS PNS-PRIMED MICROGLIA BACK IN THE CNS
Circularity of microglia			RAW STATS FROM PRISM
Leaving CNS injury site	PNS-primed in CNS		Table Analyzed	circularity compare
0.105	0.131
0.482	0.213		Column B	PNS-primed in CNS
0.357	0.386		vs.	vs.
0.133			Column A	Leaving CNS injury site
0.2
			Unpaired t test
Average circularity of microglia			P value	0.9163
Leaving CNS injury site	PNS-primed in CNS		P value summary	ns
0.2554	0.243333		Significantly different (P < 0.05)?	No
			One- or two-tailed P value?	Two-tailed
			t, df	t=0.1097 df=6
			How big is the difference?
			Mean ± SEM of column A	0.2554 ± 0.07153, n=5
			Mean ± SEM of column B	0.2433 ± 0.07516, n=3
			Difference between means	-0.01207 ± 0.11
			95% confidence interval	-0.2813 to 0.2572
			R squared (eta squared)	0.002
			F test to compare variances
			F, DFn, Dfd	1.51, 4, 2
			P value	0.8713
			P value summary	ns
			Significantly different (P < 0.05)?	No

## Sheet: SuppFig_10F
SUPPLEMENTARY FIGURE 10F: AVERAGE ASPECT RATIO OF MICROGLIA LEAVING CNS INJURY SITE VERSUS PNS-PRIMED MICROGLIA BACK IN THE CNS
Aspect ratio of microglia			RAW STATS FROM PRISM
Leaving CNS injury site	PNS-primed in CNS		Table Analyzed	AR compare
15.781	2.562
1.653	1.576		Column B	PNS-primed in CNS
1.918	1.677		vs.	vs.
13.529			Column A	Leaving CNS injury site
6.669
			Unpaired t test
Average aspect ratio of microglia			P value	0.1762
Leaving CNS injury site	PNS-primed in CNS		P value summary	ns
7.91	1.93833		Significantly different (P < 0.05)?	No
			One- or two-tailed P value?	Two-tailed
			t, df	t=1.533 df=6
			How big is the difference?
			Mean ± SEM of column A	7.91 ± 2.917, n=5
			Mean ± SEM of column B	1.938 ± 0.3132, n=3
			Difference between means	-5.972 ± 3.895
			95% confidence interval	-15.5 to 3.56
			R squared (eta squared)	0.2814
			F test to compare variances
			F, DFn, Dfd	144.5, 4, 2
			P value	0.0138
			P value summary	*
			Significantly different (P < 0.05)?	Yes

## Sheet: SuppFig_10G
SUPPLEMENTARY FIGURE 10G: AVERAGE ROUNDNESS OF MICROGLIA LEAVING CNS INJURY SITE VERSUS PNS-PRIMED MICROGLIA BACK IN THE CNS
Aspect ratio of microglia			RAW STATS FROM PRISM
Leaving CNS injury site	PNS-primed in CNS		Table Analyzed	roundness compare
0.063	0.39
0.605	0.634		Column B	PNS-primed in CNS
0.521	0.596		vs.	vs.
0.074			Column A	Leaving CNS injury site
0.15
			Unpaired t test
Average aspect ratio of microglia			P value	0.1688
Leaving CNS injury site	PNS-primed in CNS		P value summary	ns
0.2826	0.54		Significantly different (P < 0.05)?	No
			One- or two-tailed P value?	Two-tailed
			t, df	t=1.564 df=6
			How big is the difference?
			Mean ± SEM of column A	0.2826 ± 0.1162, n=5
			Mean ± SEM of column B	0.54 ± 0.0758, n=3
			Difference between means	0.2574 ± 0.1645
			95% confidence interval	-0.1452 to 0.66
			R squared (eta squared)	0.2897
			F test to compare variances
			F, DFn, Dfd	3.918, 4, 2
			P value	0.4271
			P value summary	ns
			Significantly different (P < 0.05)?	No

## Sheet: SuppFig_10H
SUPPLEMENTARY FIGURE 10H: AVERAGE SOLIDITY OF MICROGLIA LEAVING CNS INJURY SITE VERSUS PNS-PRIMED MICROGLIA BACK IN THE CNS
Solidity of microglia			RAW STATS FROM PRISM
Leaving CNS injury site	PNS-primed in CNS		Table Analyzed	solidity compare
0.61	0.47
0.766	0.532		Column B	PNS-primed in CNS
0.604	0.708		vs.	vs.
0.593			Column A	Leaving CNS injury site
0.537
			Unpaired t test
Average solidity of microglia			P value	0.5023
Leaving CNS injury site	PNS-primed in CNS		P value summary	ns
0.622	0.57		Significantly different (P < 0.05)?	No
			One- or two-tailed P value?	Two-tailed
			t, df	t=0.7135 df=6
			How big is the difference?
			Mean ± SEM of column A	0.622 ± 0.03826, n=5
			Mean ± SEM of column B	0.57 ± 0.07128, n=3
			Difference between means	-0.052 ± 0.07288
			95% confidence interval	-0.2303 to 0.1263
			R squared (eta squared)	0.07821
			F test to compare variances
			F, DFn, Dfd	2.083, 2, 4
			P value	0.4798
			P value summary	ns
			Significantly different (P < 0.05)?	No

## Sheet: SuppFig_10I
SUPPLEMENTARY FIGURE 10i: AVERAGE CIRCULARITY OF MICROGLIA FROM IN THE CNS, IN THE PNS, AND PNS-PRIMED IN THE CNS
Circularity of microglia				RAW DATA FROM PRISM
In CNS	In PNS	PNS-primed in CNS		Table Analyzed	SuppFig 10I		Table Analyzed	SuppFig 10I		Table Analyzed	SuppFig 10I
0.169	0.157	0.131
0.114	0.236	0.213		Column B	In PNS		Column C	PNS-primed in CNS		Column C	PNS-primed in CNS
0.098	0.139	0.386		vs.	vs.		vs.	vs.		vs.	vs.
0.142				Column A	In CNS		Column A	In CNS		Column B	In PNS
0.251
0.153				Unpaired t test			Unpaired t test			Unpaired t test
0.177				P value	0.7684		P value	0.1686		P value	0.4601
0.188				P value summary	ns		P value summary	ns		P value summary	ns
0.184				Significantly different (P < 0.05)?	No		Significantly different (P < 0.05)?	No		Significantly different (P < 0.05)?	No
0.17				One- or two-tailed P value?	Two-tailed		One- or two-tailed P value?	Two-tailed		One- or two-tailed P value?	Two-tailed
0.159				t, df	t=0.2978 df=24		t, df	t=1.42 df=24		t, df	t=0.8164 df=4
0.186
0.206				How big is the difference?			How big is the difference?			How big is the difference?
0.186				Mean ± SEM of column A	0.1873 ± 0.01138, n=23		Mean ± SEM of column A	0.1873 ± 0.01138, n=23		Mean ± SEM of column B	0.1773 ± 0.02979, n=3
0.242				Mean ± SEM of column B	0.1773 ± 0.02979, n=3		Mean ± SEM of column C	0.2433 ± 0.07516, n=3		Mean ± SEM of column C	0.2433 ± 0.07516, n=3
0.176				Difference between means	-0.009928 ± 0.03334		Difference between means	0.05607 ± 0.0395		Difference between means	0.066 ± 0.08085
0.116				95% confidence interval	-0.07874 to 0.05888		95% confidence interval	-0.02545 to 0.1376		95% confidence interval	-0.1585 to 0.2905
0.271				R squared (eta squared)	0.003681		R squared (eta squared)	0.07747		R squared (eta squared)	0.1428
0.097
0.25				F test to compare variances			F test to compare variances			F test to compare variances
0.236				F, DFn, Dfd	1.118, 22, 2		F, DFn, Dfd	5.694, 2, 22		F, DFn, Dfd	6.365, 2, 2
0.257				P value	>0.9999		P value	0.0203		P value	0.2715
0.279				P value summary	ns		P value summary	*		P value summary	ns
				Significantly different (P < 0.05)?	No		Significantly different (P < 0.05)?	Yes		Significantly different (P < 0.05)?	No
Average circularity of microglia
In CNS	In PNS	PNS-primed in CNS
0.187261	0.177333	0.243333

## Sheet: SuppFig_10J
SUPPLEMENTARY FIGURE 10j: AVERAGE SOLIDITY OF MICROGLIA FROM IN THE CNS, IN THE PNS, AND PNS-PRIMED IN THE CNS
Solidity of microglia				RAW DATA FROM PRISM
In CNS	In PNS	PNS-primed in CNS		Table Analyzed	SuppFig 10J		Table Analyzed	SuppFig 10J		Table Analyzed	SuppFig 10J
0.608	0.477	0.47
0.597	0.515	0.532		Column B	In PNS		Column C	PNS-primed in CNS		Column C	PNS-primed in CNS
0.625	0.486	0.708		vs.	vs.		vs.	vs.		vs.	vs.
0.628				Column A	In CNS		Column A	In CNS		Column B	In PNS
0.715
0.692				Unpaired t test			Unpaired t test			Unpaired t test
0.756				P value	0.0059		P value	0.1084		P value	0.3444
0.754				P value summary	**		P value summary	ns		P value summary	ns
0.847				Significantly different (P < 0.05)?	Yes		Significantly different (P < 0.05)?	No		Significantly different (P < 0.05)?	No
0.576				One- or two-tailed P value?	Two-tailed		One- or two-tailed P value?	Two-tailed		One- or two-tailed P value?	Two-tailed
0.712				t, df	t=3.022 df=24		t, df	t=1.668 df=24		t, df	t=1.071 df=4
0.696
0.654				How big is the difference?			How big is the difference?			How big is the difference?
0.679				Mean ± SEM of column A	0.6789 ± 0.02183, n=23		Mean ± SEM of column A	0.6789 ± 0.02183, n=23		Mean ± SEM of column B	0.4927 ± 0.01146, n=3
0.836				Mean ± SEM of column B	0.4927 ± 0.01146, n=3		Mean ± SEM of column C	0.57 ± 0.07128, n=3		Mean ± SEM of column C	0.57 ± 0.07128, n=3
0.796				Difference between means	-0.1862 ± 0.06164		Difference between means	-0.1089 ± 0.06531		Difference between means	0.07733 ± 0.0722
0.494				95% confidence interval	-0.3135 to -0.05903		95% confidence interval	-0.2437 to 0.02588		95% confidence interval	-0.1231 to 0.2778
0.691				R squared (eta squared)	0.2756		R squared (eta squared)	0.1038		R squared (eta squared)	0.2229
0.394
0.792				F test to compare variances			F test to compare variances			F test to compare variances
0.648				F, DFn, Dfd	27.8, 22, 2		F, DFn, Dfd	1.39, 2, 22		F, DFn, Dfd	38.66, 2, 2
0.721				P value	0.0705		P value	0.54		P value	0.0504
0.704				P value summary	ns		P value summary	ns		P value summary	ns
				Significantly different (P < 0.05)?	No		Significantly different (P < 0.05)?	No		Significantly different (P < 0.05)?	No
Average solidity of microglia
In CNS	In PNS	PNS-primed in CNS
0.678913	0.492667	0.57

[truncated: 3 more sheets: SuppFig_10K, SuppFig_10L, SuppFig_10M]
